# Supplementary material for: Luminescence tuning and exciton dynamics of Mn-doped CsPbCl3nanocrystals
Source: Royal Society of Chemistry journal article supplement (doi:10.1039/c7nr06745c), 2017-01-01
Supplement: c7nr06745c1.pdf [file c7nr06745c1.pdf]

Electronic Supplementary Information (ESI)

## **Luminescence Tuning and Exciton Dynamics of Mn-doped CsPbCl<sub>3</sub> Nanocrystals**

Apurba De, Navendu Mondal and Anunay Samanta\*

School of Chemistry, University of Hyderabad, Hyderabad-500 046, India

\*Corresponding author: [anunay@uohyd.ac.in](mailto:anunay@uohyd.ac.in)

### **List of contents:**

1. Experimental Section: S1 (p: S2-S3).
2. Transmission Electron Microscope (TEM) images and Tolerance and octahedral factor for different samples Figure S1, S2 (p: S4).
3. UV-Vis absorption spectra of all NCs: Figure S3 (p: S5).
4. (a) Tauc plot, (b) Excitation spectra of 12% Mn:CsPbCl<sub>3</sub>: Figure S4 (p: S5).
5. (a)-(d) TA spectra and (e) Comparison of bleach recovery kinetics: Figure S5 (p: S6).
6. PL and TA spectra of Br<sup>-</sup> exchanged undoped and 12% Mn doped CsPbCl<sub>3</sub> NCs: Figure S6 (p: 76).
7. Relative Mn content estimated from ICP-OES: Table S1 (p: S8)
8. Mn PL lifetime decay parameters of different samples: Table S2 (p: S8).

## **S1. Experimental Section:**

### **S1.1 Characterization:**

Transmission electron microscopy (TEM) images were recorded by using a transmission electron microscope, TECNAI FE12, JEOL, Japan having a 120 kV electron source. Powdered X-ray diffraction (PXRD) patterns were recorded on Bruker D8 Advance diffractometer (Bruker-AXS, Karlsruhe, Germany) using Cu-K $\alpha$  X-radiation ( $\lambda = 1.5406 \text{ \AA}$ ) at 40 kV and 30 mA power. Room temperature X-band EPR measurements were performed by using JEOL JES-FA200 spectrometer. The elemental ratio was determined by Varian 720-ES, inductively coupled plasma optical emission spectrometer (ICP-OES). UV-Vis absorption and emission spectra were recorded by Cary100, Varian spectrophotometer and FlouroLog-3, Horiba Jobin Yvon spectrofluorimeter, respectively.

Transient Measurement: Details of the femtosecond transient absorption setup used in this study has been described elsewhere.<sup>1</sup> Briefly, the setup consisted of a mode-locked Ti:sapphire seed laser (Mai-Tai, Spectra Physics) with 80 MHz repetition rate having center wavelength 801 nm. A part of its output was directed to the regenerative amplifier (Spitfire Ace, Spectra Physics) which was pumped by an output of 527 nm of a frequency doubled Nd:YLF laser (Empower, Spectra Physics). The amplified output of 801 nm (4.2 W), operating at a repetition rate of 1 kHz were divided into two parts. One part was directed to an optical parametric amplifier (TOPAS-Prime, Spectra Physics) to generate excitation pulse at 330 nm and second part was passed through a 4 ns delay unit followed by a CaF<sub>2</sub> crystal to generate white light continuum. The white light was split by a beam splitter to generate a signal and a reference beam. Both the beams were directed to the

detector (photodiode array) to record the pump induced changes at different time delay of probe beam. All the spectra were chirp-corrected for group velocity dispersion of white light continuum. The instrument resolution was  $\sim 120$  fs.

### **S1.2 QY Measurement:**

The excitonic and Mn PL QY were measured using quinine sulphate in 1.0 N aqueous  $\text{H}_2\text{SO}_4$  solution (QY= 0.546)<sup>2</sup> and rhodamine-6G<sup>3</sup> in aqueous medium (QY= 0.95) as reference standard, respectively.

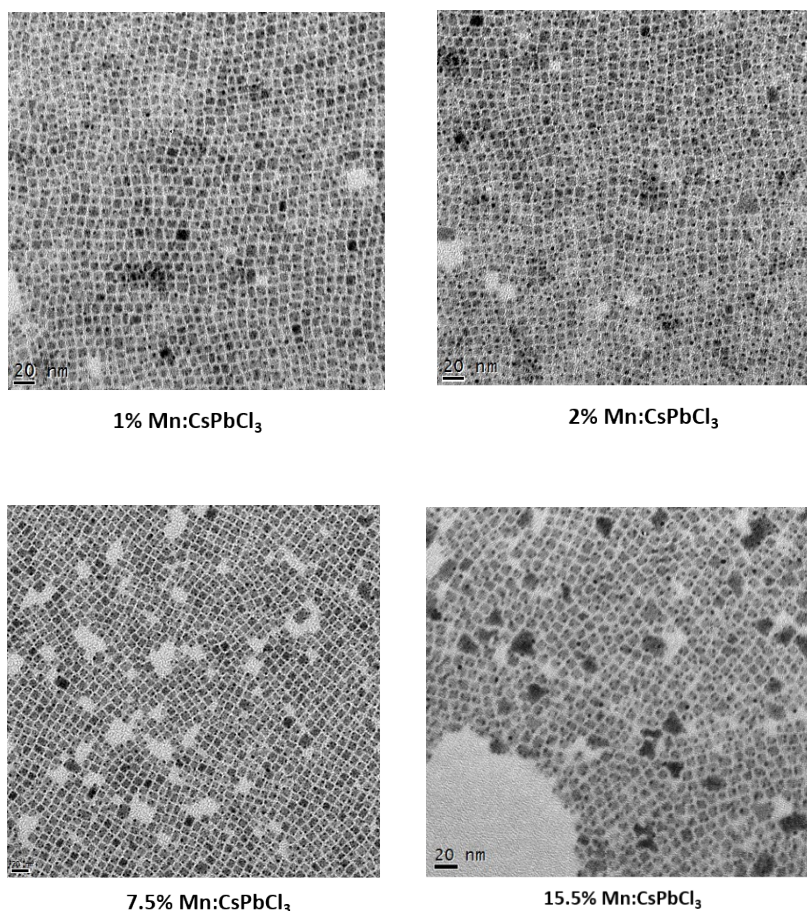

**Figure S1.** TEM images of different samples showing uniform size distribution. Scale bar shown here is of 20 nm.

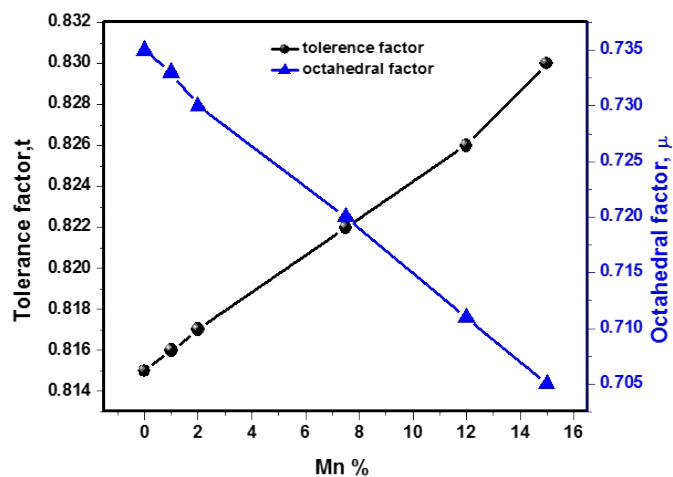

**Figure S2.** Tolerance factor and octahedral factor of different sets of synthesized materials.

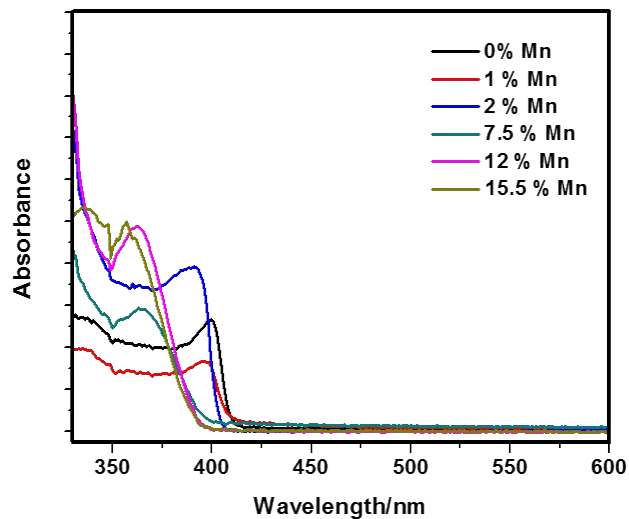

**Figure S3.** UV-Vis absorption spectra of undoped and doped CsPbCl<sub>3</sub> NCs.

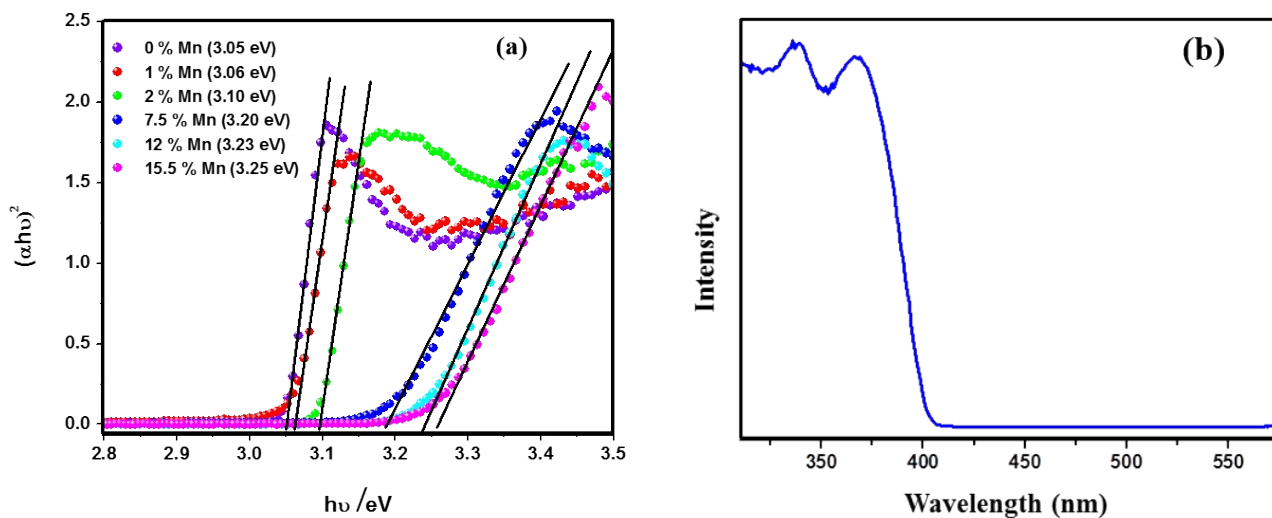

**Figure S4.** (a) Tauc plot of undoped and doped nanocrystals. Estimated band gaps are given in brackets. (b) Excitation spectra of 12% Mn:CsPbCl<sub>3</sub> recorded by monitoring at 604 nm.

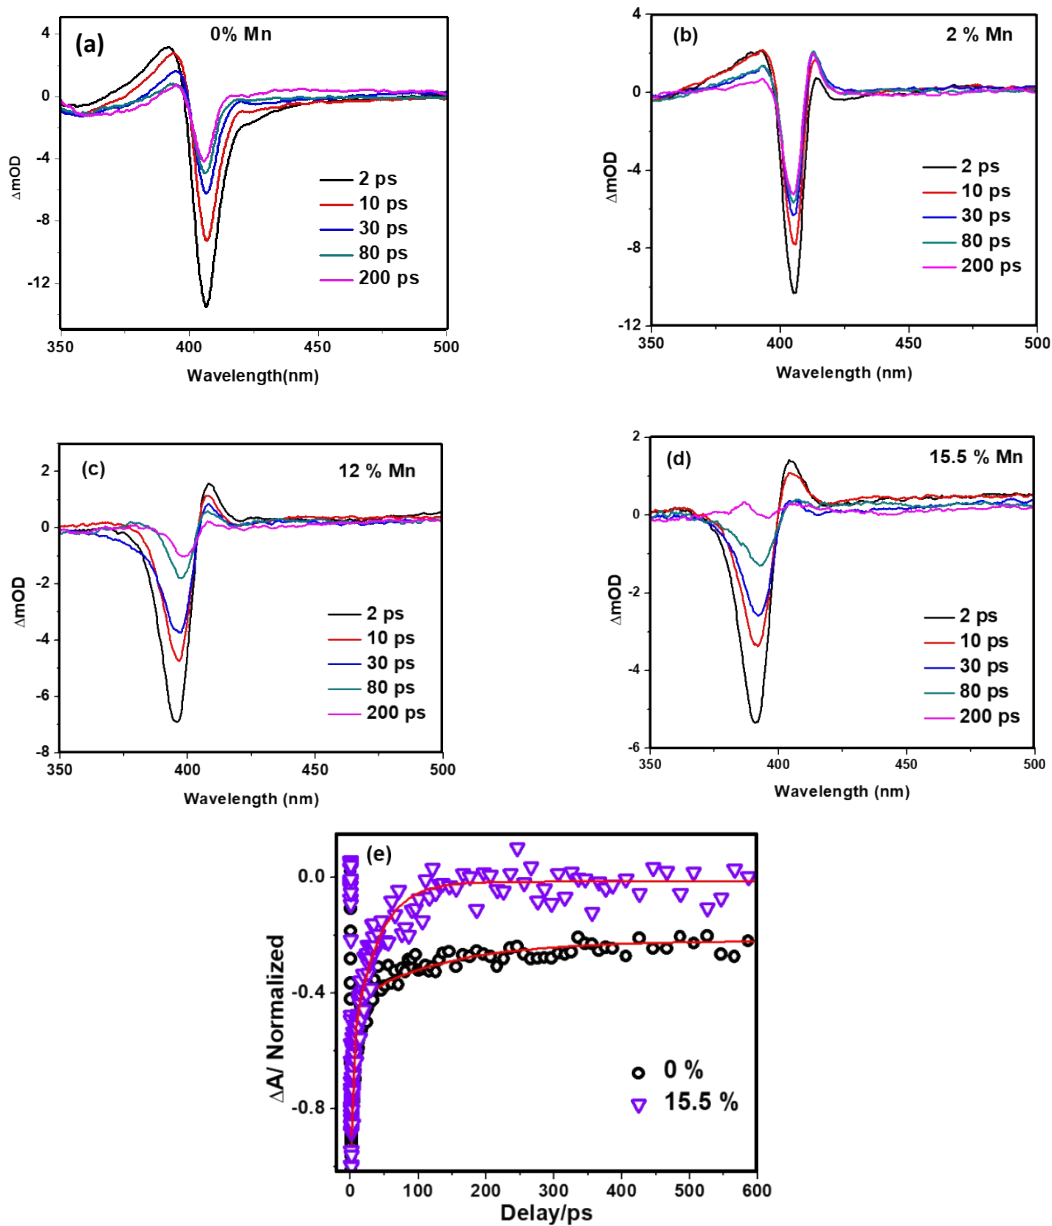

**Figure S5.** TA spectra of (a) undoped, (b) 2% Mn, (c) 12% Mn and (d) 15.5% Mn doped CsPbCl<sub>3</sub> NCs in toluene at 330 nm excitation (E) Comparison of bleach recovery kinetics of 0% and 15.5% Mn-doped CsPbCl<sub>3</sub> NCs.

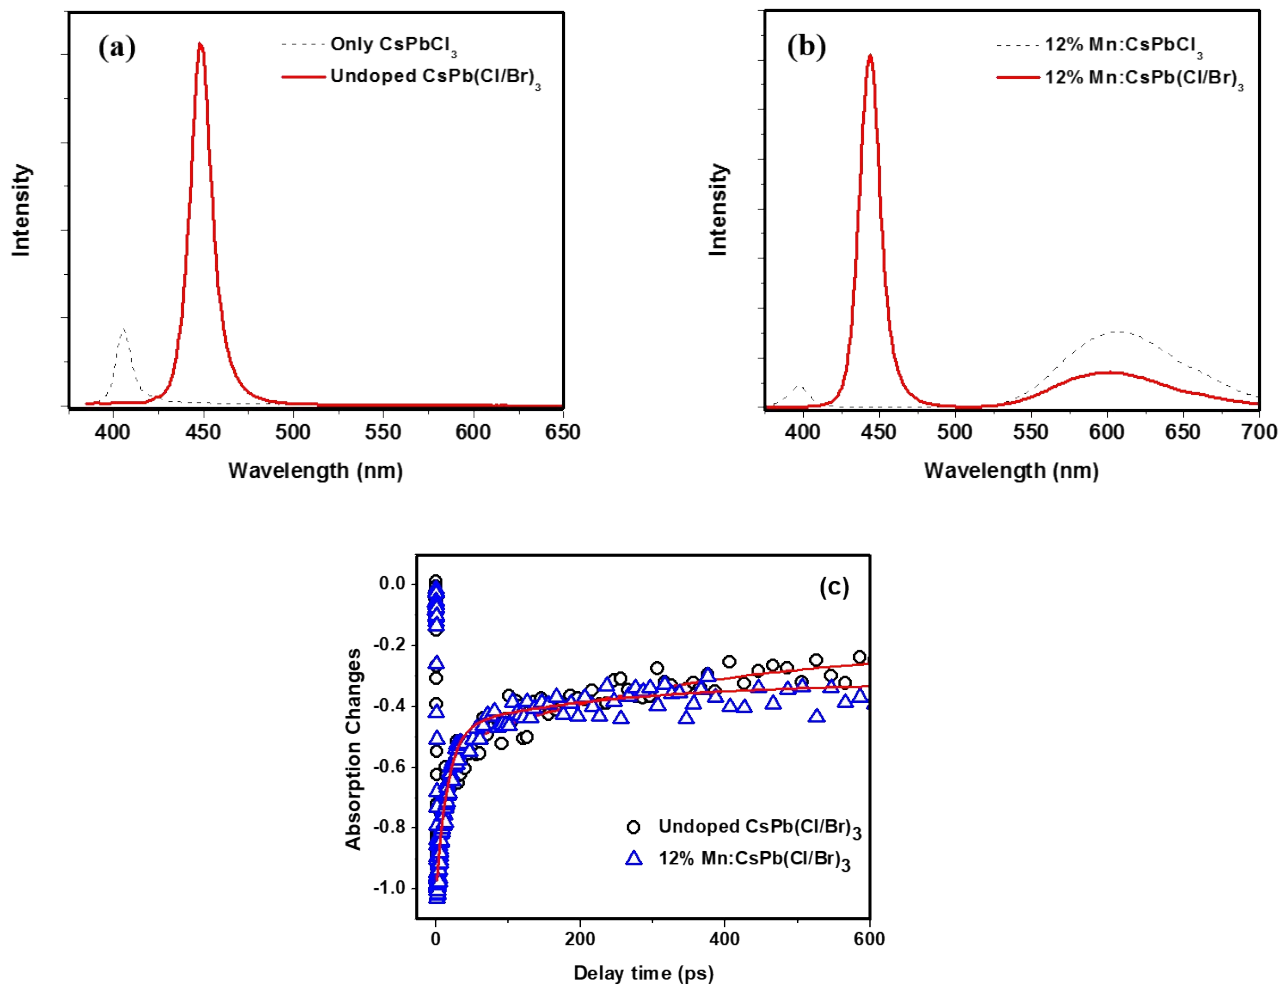

**Figure S6.** Dotted lines represent PL spectra of (a) Undoped CsPbCl<sub>3</sub> NCs (b) 12% Mn doped CsPbCl<sub>3</sub> NCs. Solid lines are for Br<sup>-</sup> exchanged NCs for both cases. Halide (Br<sup>-</sup>) exchange was performed by adding freshly prepared CsPbBr<sub>3</sub> NCs solution dispersed in toluene into the sample of interest. (c) Comparison of bleach recovery dynamics between undoped and 12% Mn doped CsPb(Cl/Br)<sub>3</sub> NCs.

Table S1. Relative Mn content estimated from ICP-OES against the precursor used during synthesis.

| Precursor ratio %<br>(Mn/Pb) | ICP ratio %<br>(Mn/Pb) |
|------------------------------|------------------------|
| 10                           | 1                      |
| 20                           | 2                      |
| 30                           | 7.5                    |
| 40                           | 12                     |
| 50                           | 15.5                   |

Table S2. Mn PL decay parameters of different samples by monitoring at their respective peak position.

| Sample                       | $t_1$ ( $b_1$ ) [ms]   | $t_2$ ( $b_2$ ) [ms]   | $\langle t_{int} \rangle$ [ms] |
|------------------------------|------------------------|------------------------|--------------------------------|
| 1% Mn:CsPbCl <sub>3</sub>    | $1.3 \pm 0.03$         | -----                  | 1.30                           |
| 2% Mn:CsPbCl <sub>3</sub>    | $1.24 \pm 0.05$        | -----                  | 1.24                           |
| 7.5% Mn:CsPbCl <sub>3</sub>  | $0.70 \pm 0.01(0.79)$  | $0.18 \pm 0.01 (0.21)$ | 0.66                           |
| 12% Mn:CsPbCl <sub>3</sub>   | $0.64 \pm 0.03 (0.86)$ | $0.10 \pm 0.03 (0.14)$ | 0.51                           |
| 15.5% Mn:CsPbCl <sub>3</sub> | $0.45 \pm 0.02 (0.82)$ | $0.1 \pm 0.01 (0.18)$  | 0.43                           |

1. N. Mondal and A. Samanta, *J. Phys. Chem. C*, 2016, **120**, 650-658.
2. W. H. Melhuish, *J. Phys. Chem.* 1961, **65**, 229.
3. R. F. Kubin and A. N. Fletcher, *JOL*, 1982, **27**, 455
